# Supplementary material
Source: MDPI journal article supplement (https://www.mdpi.com/1999-4907/8/9/309)
Supplement: s1 [file s1]

Archive with 2 entries (2 files):
- Supplementary_Files_Fig_S1-S5_Final.pdf
- Supplementary_Files_Table_S1_Final.pdf
