# Supplementary material
Source: MDPI journal article supplement (https://www.mdpi.com/1999-4907/8/9/309)
Supplement: s1 [file s1 › Supplementary_Files_Fig_S1-S5_Final.pdf]

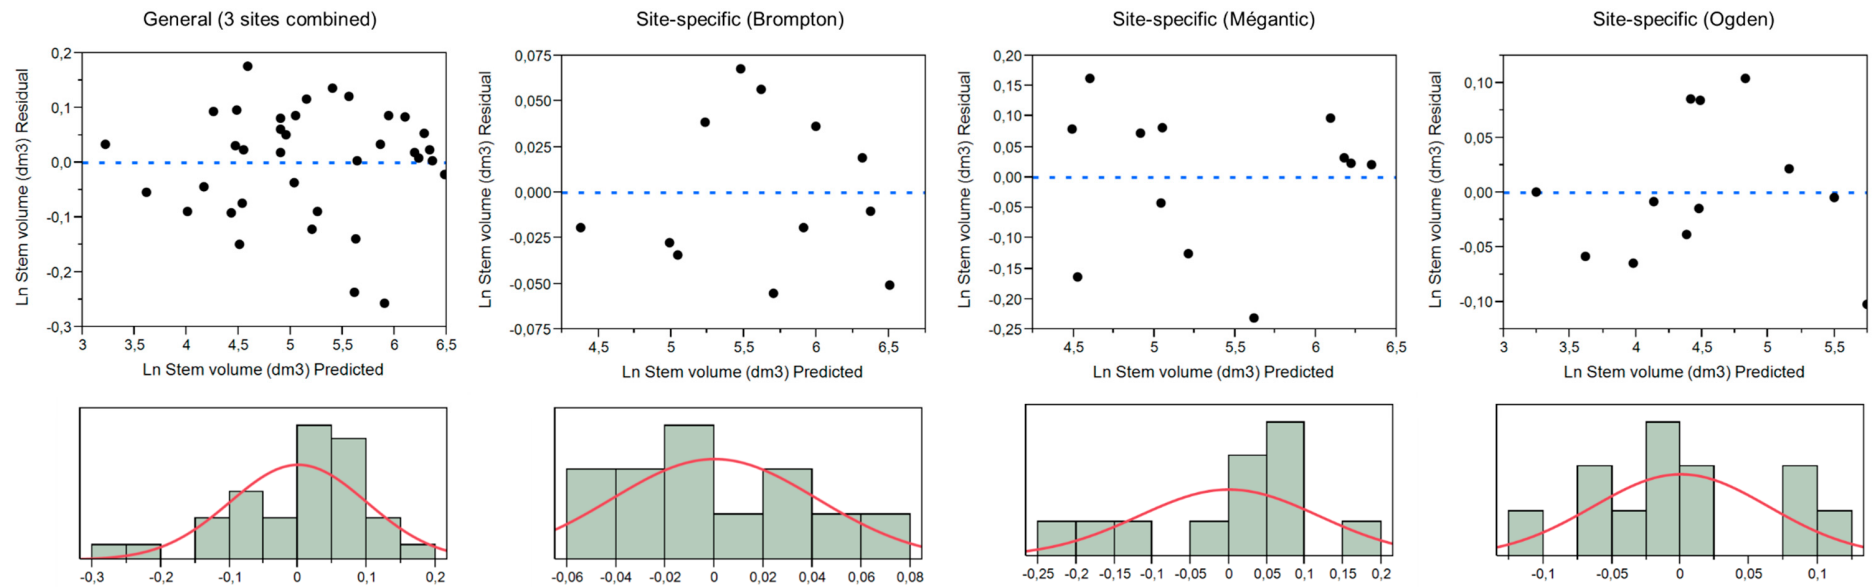

Figure S1. Residuals plot and residuals distribution for the general and site-specific relationships between  $\ln$  DBH (cm) and  $\ln$  Stem volume ( $\text{dm}^3$ ). The red line indicates a normal distribution.

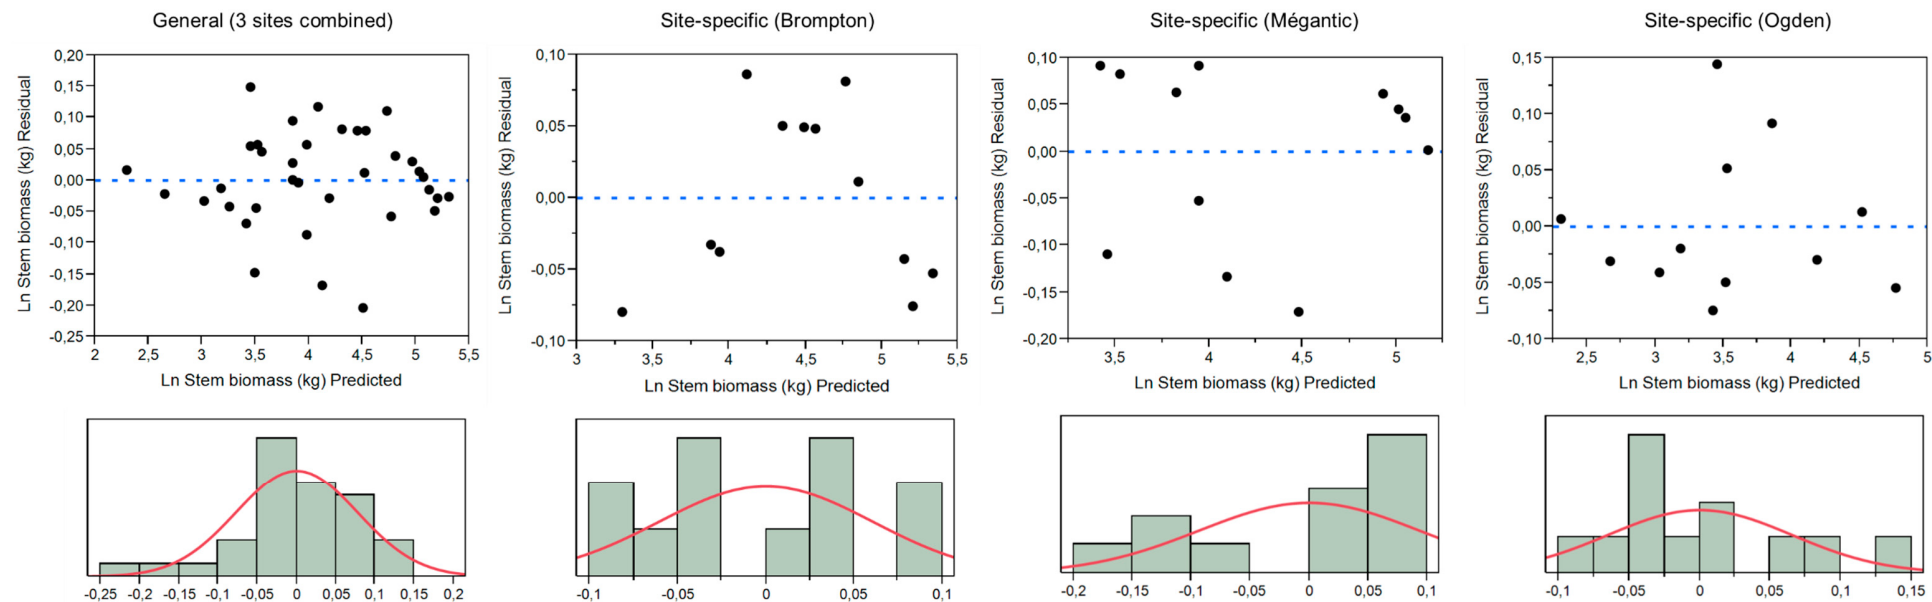

Figure S2. Residuals plot and residuals distribution for the general and site-specific relationships between  $\ln$  DBH (cm) and  $\ln$  Stem biomass (kg). The red line indicates a normal distribution.

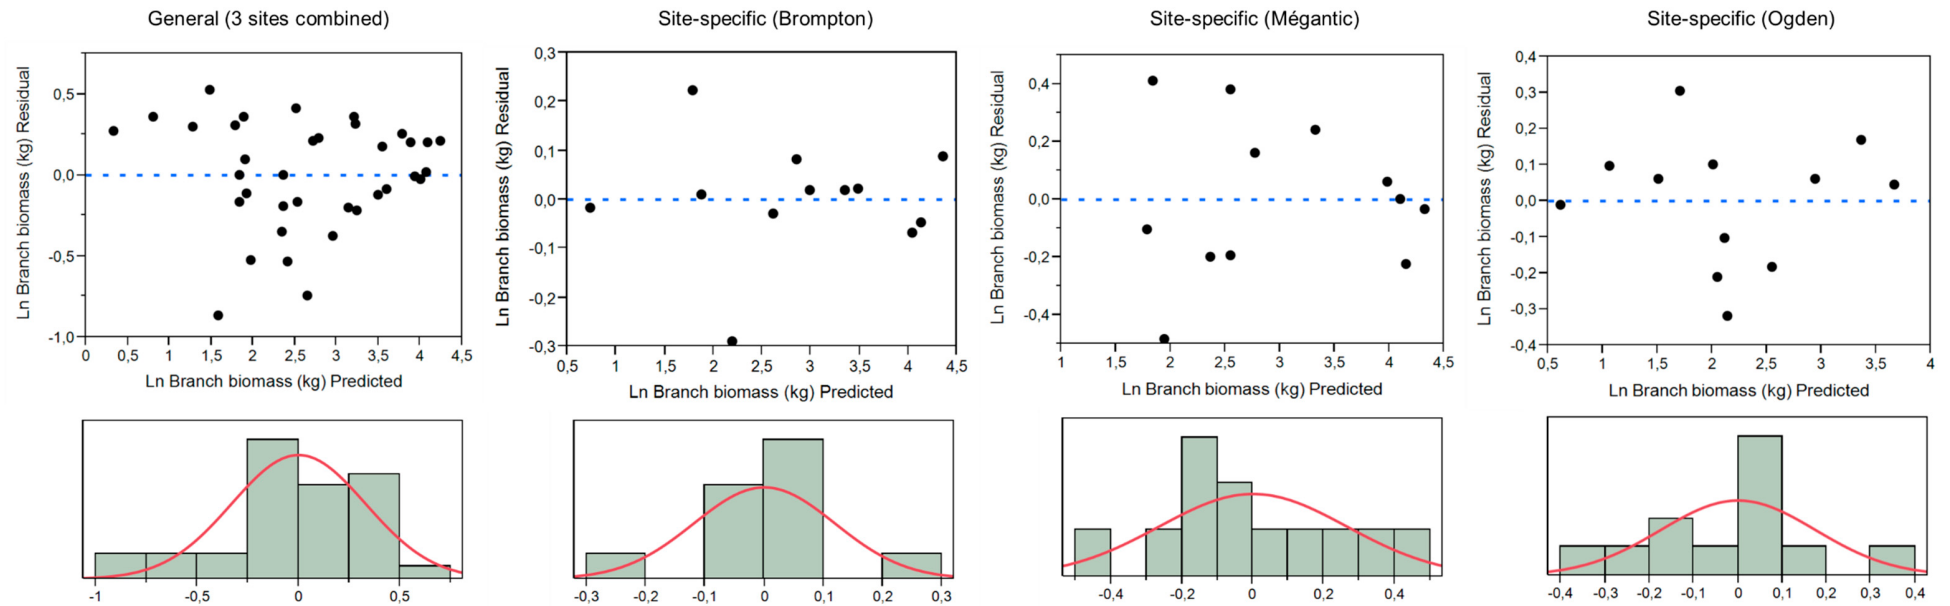

Figure S3. Residuals plot and residuals distribution for the general and site-specific relationships between  $\ln$  DBH (cm) and  $\ln$  Branch biomass (kg). The red line indicates a normal distribution.

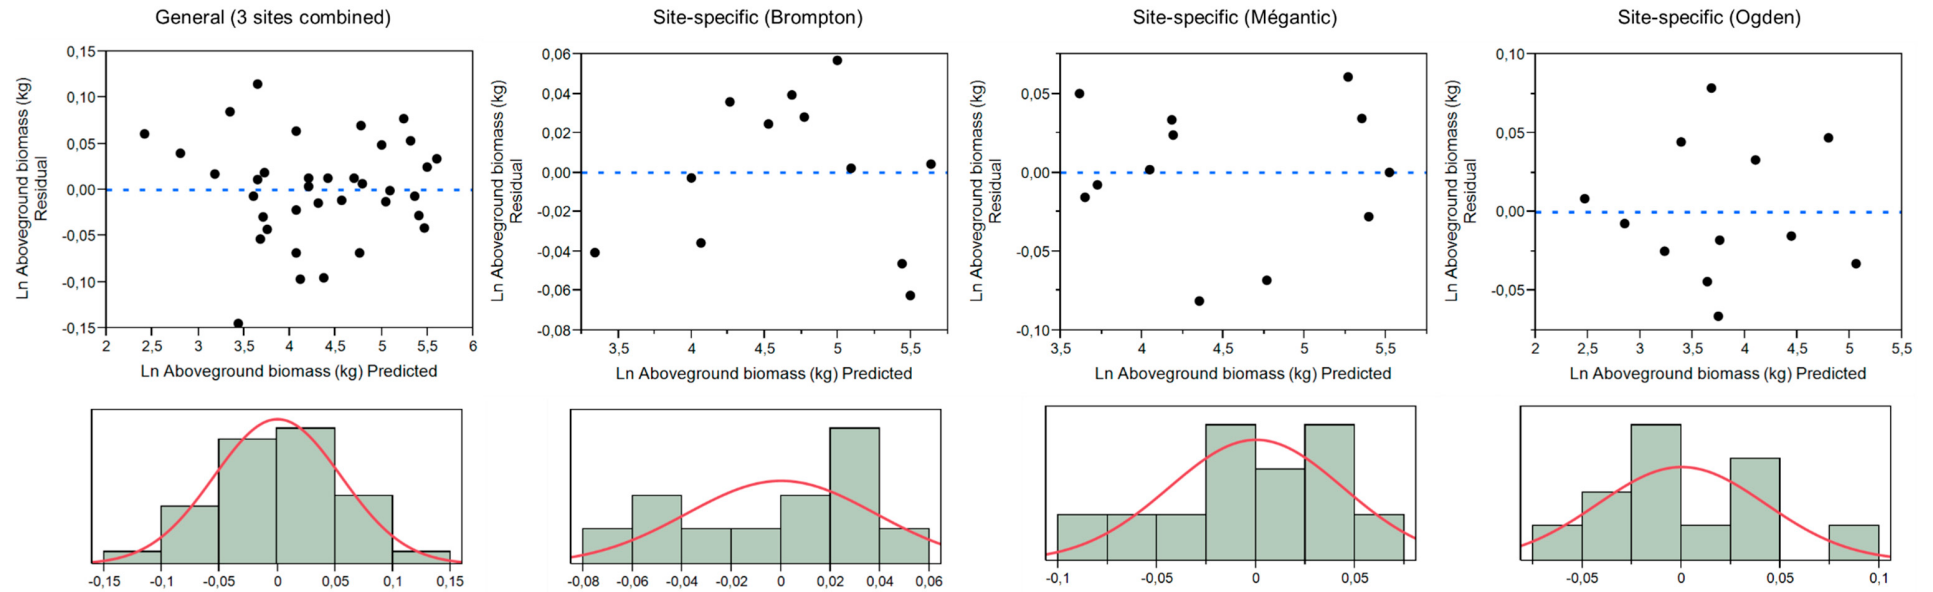

Figure S4. Residuals plot and residuals distribution for the general and site-specific relationships between ln DBH (cm) and ln Aboveground woody biomass (kg). The red line indicates a normal distribution.

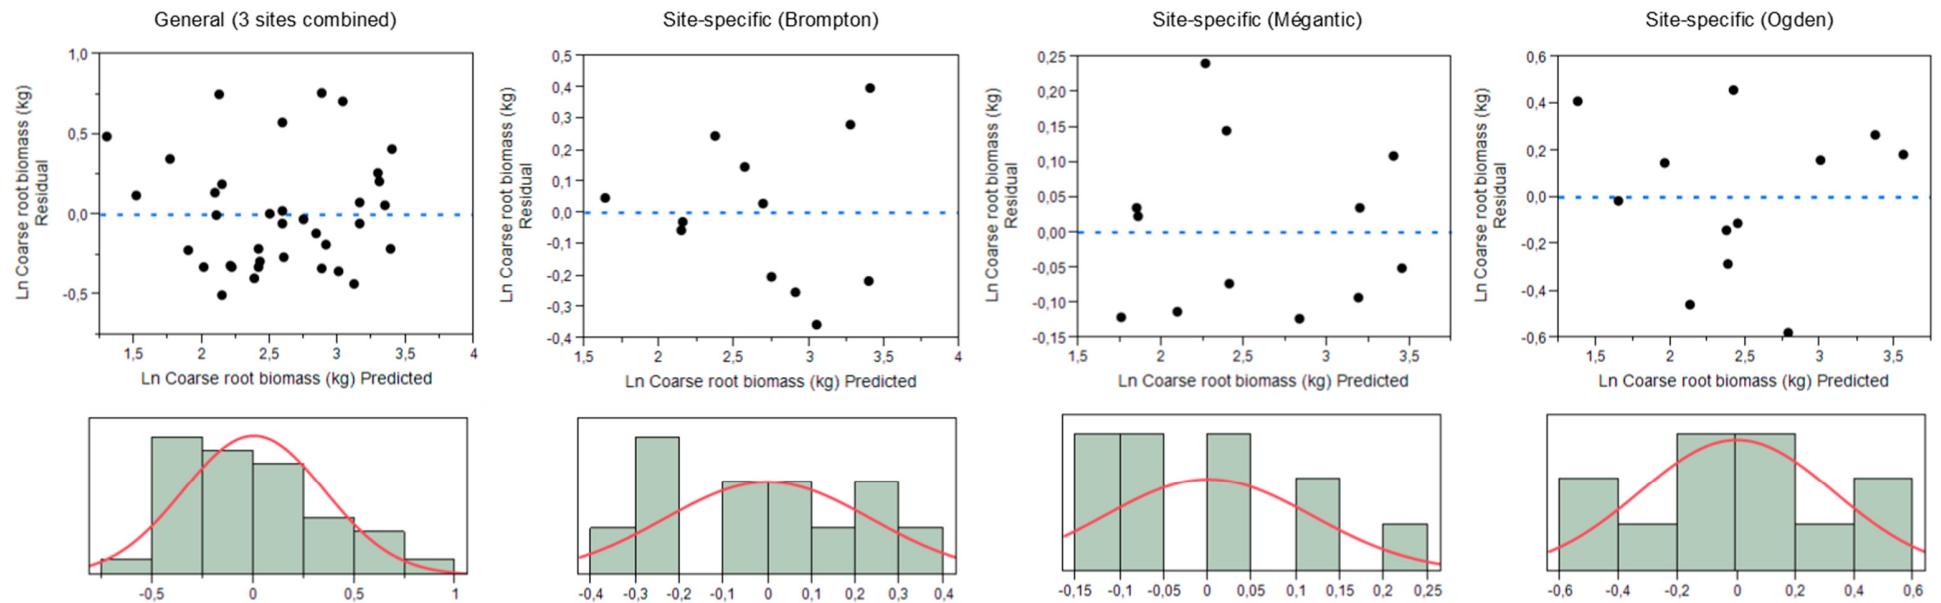

Figure S5. Residuals plot and residuals distribution for the general and site-specific relationships between  $\ln$  DBH (cm) and  $\ln$  Coarse root biomass (kg). The red line indicates a normal distribution.
