# Supplementary material
Source: MDPI journal article supplement (https://www.mdpi.com/1999-4907/8/9/309)
Supplement: s1 [file s1 › Supplementary_Files_Table_S1_Final.pdf]

Table S1. Allometric parameter estimates and their associated standard error (SE) and percent relative standard error (PRSE) obtained with the ordinary least squares (OLS) and the robust regression methods for bivariate line fitting. All equations are in the form of  $\ln(y) = \ln a + b \ln(x)$ , where  $x$  is DBH and  $y$  is the volume or biomass of the tree component. Percent relative standard error (PRSE) was calculated as  $100 \times (SE/\theta)$  where SE and  $\theta$  are the standard error of the parameter and the parameter value, respectively.

| Tree compartment                     | Model    | $\ln a$  |        |      |        |          |        | $b$      |        |      |        |          |        |
|--------------------------------------|----------|----------|--------|------|--------|----------|--------|----------|--------|------|--------|----------|--------|
|                                      |          | Estimate |        | SE   |        | PRSE (%) |        | Estimate |        | SE   |        | PRSE (%) |        |
|                                      |          | OLS      | Robust | OLS  | Robust | OLS      | Robust | OLS      | Robust | OLS  | Robust | OLS      | Robust |
| Stem volume<br>(dm <sup>3</sup> )    | General  | -1.44    | -1.45  | 0.14 | 0.10   | 9.6      | 7.0    | 2.31     | 2.32   | 0.05 | 0.04   | 2.1      | 1.6    |
|                                      | Brompton | -1.11    | -1.11  | 0.14 | 0.10   | 12.6     | 8.6    | 2.22     | 2.22   | 0.05 | 0.03   | 2.1      | 1.4    |
|                                      | Megantic | -1.32    | -1.32  | 0.36 | 0.29   | 27.2     | 22.1   | 2.27     | 2.27   | 0.12 | 0.09   | 5.3      | 4.2    |
|                                      | Ogden    | -1.09    | -1.09  | 0.16 | 0.14   | 14.4     | 12.5   | 2.15     | 2.15   | 0.06 | 0.05   | 2.8      | 2.5    |
| Stem biomass<br>(kg)                 | General  | -2.01    | -2.01  | 0.11 | 0.07   | 5.3      | 3.4    | 2.14     | 2.14   | 0.04 | 0.02   | 1.7      | 1.1    |
|                                      | Brompton | -1.94    | -1.94  | 0.20 | 0.21   | 10.5     | 10.7   | 2.13     | 2.13   | 0.07 | 0.07   | 3.1      | 3.2    |
|                                      | Megantic | -2.07    | -2.07  | 0.28 | 0.21   | 13.7     | 10.3   | 2.15     | 2.15   | 0.10 | 0.07   | 4.5      | 3.2    |
|                                      | Ogden    | -1.97    | -1.97  | 0.16 | 0.08   | 8.1      | 4.2    | 2.12     | 2.12   | 0.06 | 0.03   | 2.9      | 1.5    |
| Branch biomass<br>(kg)               | General  | -5.22    | -5.16  | 0.46 | 0.43   | 8.8      | 8.4    | 2.76     | 2.74   | 0.16 | 0.14   | 5.7      | 5.1    |
|                                      | Brompton | -8.57    | -8.53  | 0.40 | 0.37   | 4.7      | 4.4    | 3.78     | 3.76   | 0.13 | 0.11   | 3.5      | 3.0    |
|                                      | Megantic | -6.19    | -6.19  | 0.80 | 0.76   | 13.0     | 12.2   | 3.12     | 3.12   | 0.27 | 0.24   | 8.7      | 7.7    |
|                                      | Ogden    | -4.68    | -4.68  | 0.43 | 0.23   | 9.1      | 5.0    | 2.63     | 2.63   | 0.16 | 0.09   | 6.2      | 3.3    |
| Aboveground<br>woody biomass<br>(kg) | General  | -2.14    | -2.13  | 0.08 | 0.08   | 3.6      | 3.6    | 2.26     | 2.26   | 0.03 | 0.03   | 1.2      | 1.1    |
|                                      | Brompton | -2.58    | -2.58  | 0.13 | 0.12   | 5.0      | 4.7    | 2.40     | 2.40   | 0.04 | 0.04   | 1.8      | 1.7    |
|                                      | Megantic | -2.38    | -2.38  | 0.13 | 0.10   | 5.6      | 4.0    | 2.34     | 2.34   | 0.05 | 0.03   | 1.9      | 1.4    |
|                                      | Ogden    | -2.03    | -2.03  | 0.10 | 0.06   | 5.1      | 3.2    | 2.23     | 2.23   | 0.04 | 0.03   | 1.8      | 1.1    |
| Coarse root<br>biomass<br>(kg)       | General  | -1.69    | -1.69  | 0.47 | 0.46   | 28.2     | 27.4   | 1.50     | 1.50   | 0.17 | 0.16   | 11.1     | 10.8   |
|                                      | Brompton | -3.10    | -3.10  | 0.78 | 0.65   | 25.3     | 20.9   | 1.92     | 1.92   | 0.26 | 0.23   | 13.5     | 11.9   |
|                                      | Megantic | -3.66    | -3.66  | 0.37 | 0.27   | 10.1     | 7.5    | 2.13     | 2.13   | 0.13 | 0.09   | 5.9      | 4.3    |
|                                      | Ogden    | -2.38    | -2.38  | 0.78 | 0.64   | 32.9     | 27.0   | 1.89     | 1.89   | 0.30 | 0.25   | 16.0     | 13.0   |
